# Supplementary material
Source: MDPI journal article supplement (https://www.mdpi.com/2072-4292/15/4/878)
Supplement: s1 [file s1]

## Supplementary Material

### *Distinguishing Dominant Drivers on LST Dynamics in the Qinling-Daba Mountains in Central China from 2000 to 2020*

Mengzhu Xi <sup>1,2,3</sup>, Wen Zhang <sup>1,2,3</sup>, Wanlong Li <sup>1,2,3</sup>, Haodong Liu<sup>1,2,3</sup> and Hui Zheng <sup>1,2,3,\*</sup>

<sup>1</sup> Key Laboratory of Geospatial Technology for Middle and Lower Yellow River Regions, Ministry of Education, College of Environment and Planning, Henan University, Kaifeng 475004, China

<sup>2</sup> Henan Key Laboratory of Earth System Observation and Modeling, Henan University, Kaifeng 475004, China

<sup>3</sup> Henan Key Laboratory of Integrated Air Pollution Control and Ecological Security, Kaifeng 475004, China

\* Correspondence: zhenghui@vip.henu.edu.cn

**Table S1.** Correlation analysis between all the variables.

| Predictor         | Coef      | SE Coef | P-Value | VIF1  | VIF2  |
|-------------------|-----------|---------|---------|-------|-------|
| Precipitation     | 0.0015    | 0.000   | 0.000   | 2.67  | 2.46  |
| Cloud Cover       | -3.9554   | 0.061   | 0.000   | 3.13  | 2.85  |
| Wind              | -0.1640   | 0.006   | 0.000   | 1.62  | 1.57  |
| Relative Humidity | -1.2301   | 0.042   | 0.000   | 2.43  | 2.38  |
| Albedo            | -1.6053   | 0.082   | 0.000   | 2.08  | 2.02  |
| Solar Radiation   | -0.0336   | 0.000   | 0.000   | 6.03  | 5.95  |
| Elevation         | -0.0022   | 0.000   | 0.000   | 37.85 | 4.03  |
| Slope             | 0.0499    | 0.000   | 0.000   | 1.49  | 1.46  |
| Aspect            | 0.0463    | 0.001   | 0.000   | 1.01  | 1.01  |
| NDVI              | 1.9264    | 0.045   | 0.000   | 2.51  | 2.359 |
| Vegetation type   | 0.0017    | 0.001   | 0.000   | 1.30  | 1.29  |
| LUCC              | 0.0901    | 0.003   | 0.000   | 1.07  | 1.07  |
| Tmean             | 0.4191    | 0.002   | 0.000   | 31.44 | ***   |
| Snowfall          | -3252.603 | 17.712  | 0.000   | 4.36  | ***   |

Notes: VIF, variance inflation factor;  $VIF < 10$ , no collinearity problem;  $10 \leq VIF \leq 100$ , high collinearity. Among them, VIF1 is the result of the first collinearity analysis, and VIF2 is the result after variable screening.

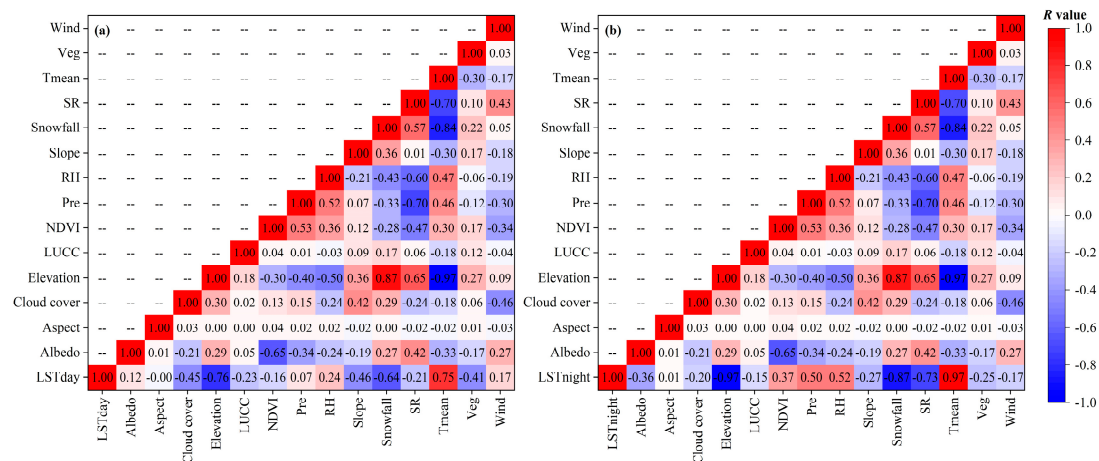**Figure S1.** Correlation analysis between all the variables in the (a) daytime and (b) nighttime.

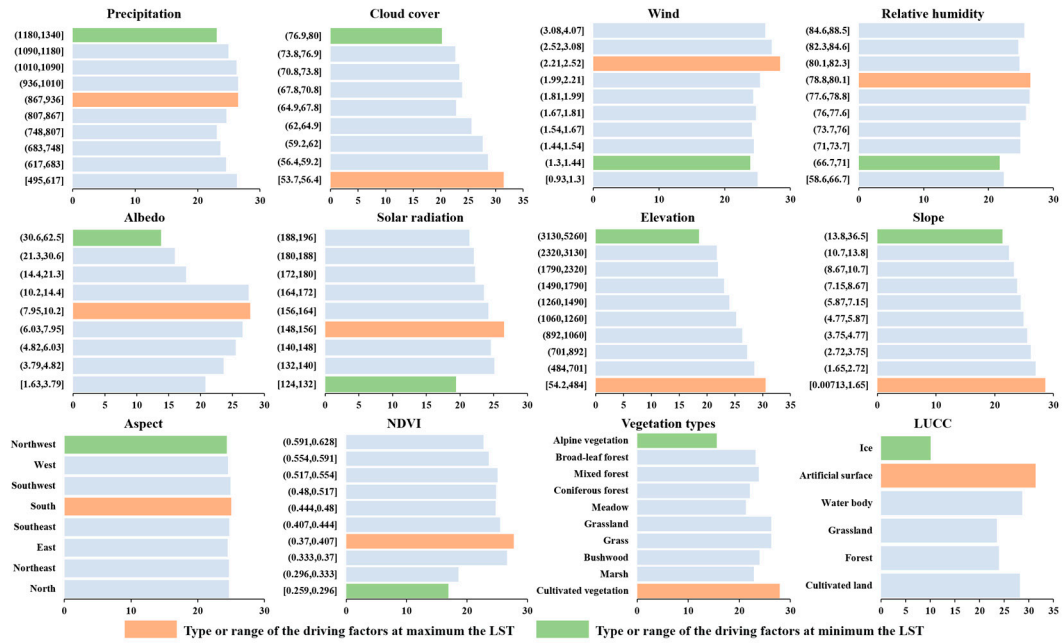

**Figure S2.** Optimal ranges and tipping points of driving factors that influence daytime LST. Orange indicates the type or range of the driving factors at maximum the LST and green indicates the type or range of the driving factors at minimum the LST. The statistical significance test was passed at the 95% confidence level.

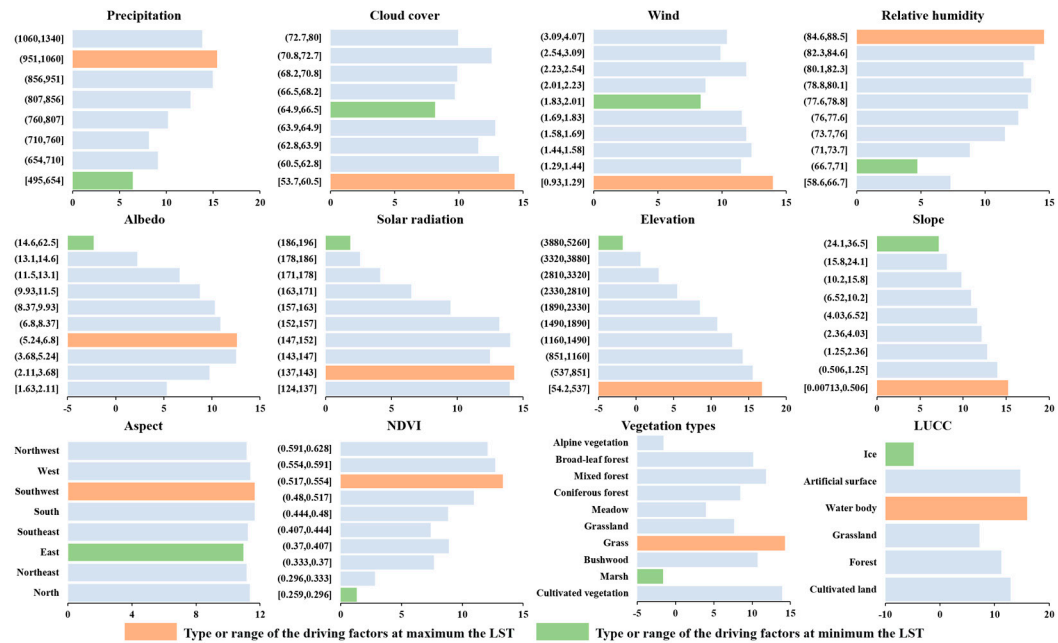

**Figure S3.** Optimal ranges and tipping points of driving factors that influence nighttime LST. Orange indicates the type or range of the driving factors at maximum the LST and green indicates the type or range of the driving factors at minimum the LST. The statistical significance test was passed at the 95% confidence level.
